# Supplementary material
Source: PubMed Central journal article supplement (PMC3755041)
Supplement: NIHMS502803-supplement-01.pdf [file NIHMS502803-supplement-01.pdf]

## Supporting Information

## Supplementary Figures

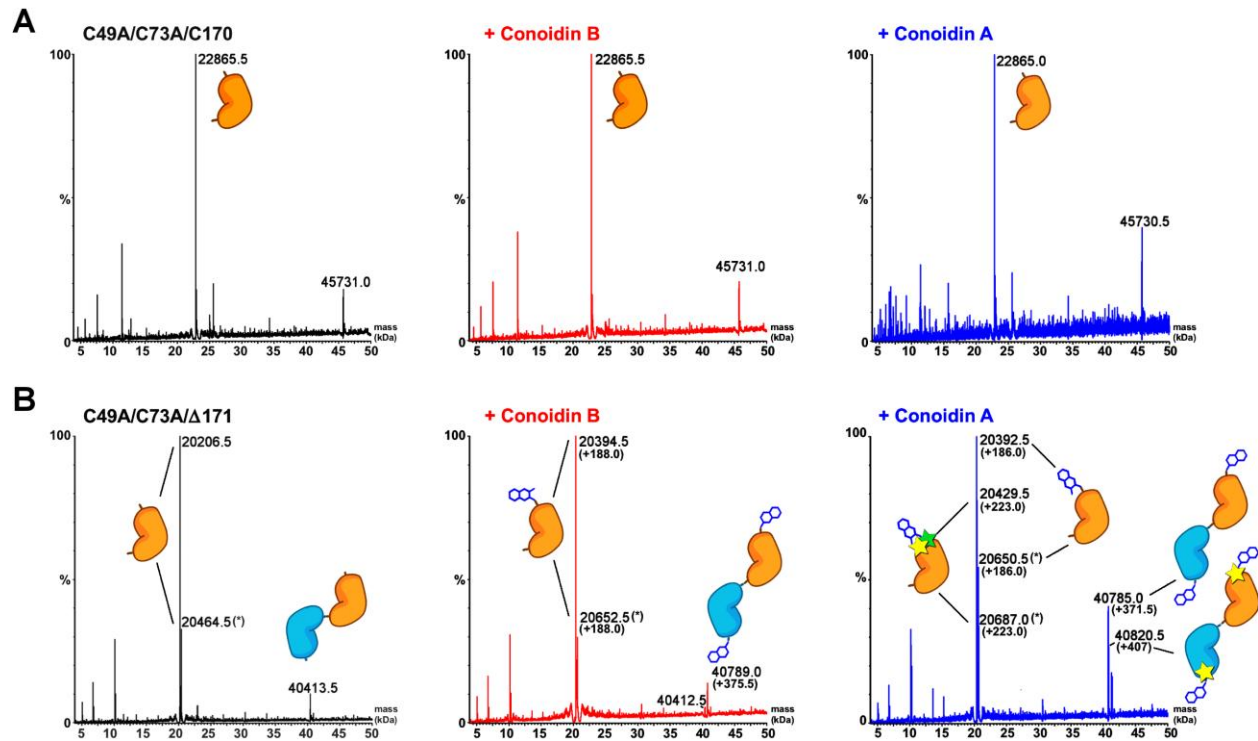

**Figure S1, related to Figure 4.** Conoidin A and conoidin B covalently modify mutant AcePrx-1 by alkylation and/or crosslinking based on electrospray mass spectra (LC-ESI-MS). Modified and unmodified proteins are indicated by schematic drawings. The quinoxaline dioxide (QDO) adduct formed upon reaction is represented as two conjoined hexagons. The filled hexagon indicates deoxygenation to the mono-oxide. Each star represents addition of a single oxygen to the protein.

A. The C49A/C73A/C170A triple mutant (left) does not produce a mass change in the presence of conoidin A (right) or conoidin B (middle), confirming that cysteine residues are the specific site of modification on AcePrx-1.

B. The C49A/C73A/Δ171 predominately forms monomeric alkylation products rather than dimeric crosslinks due to the sole presence of Cys170 to initiate nucleophilic  $S_N2$  substitution.

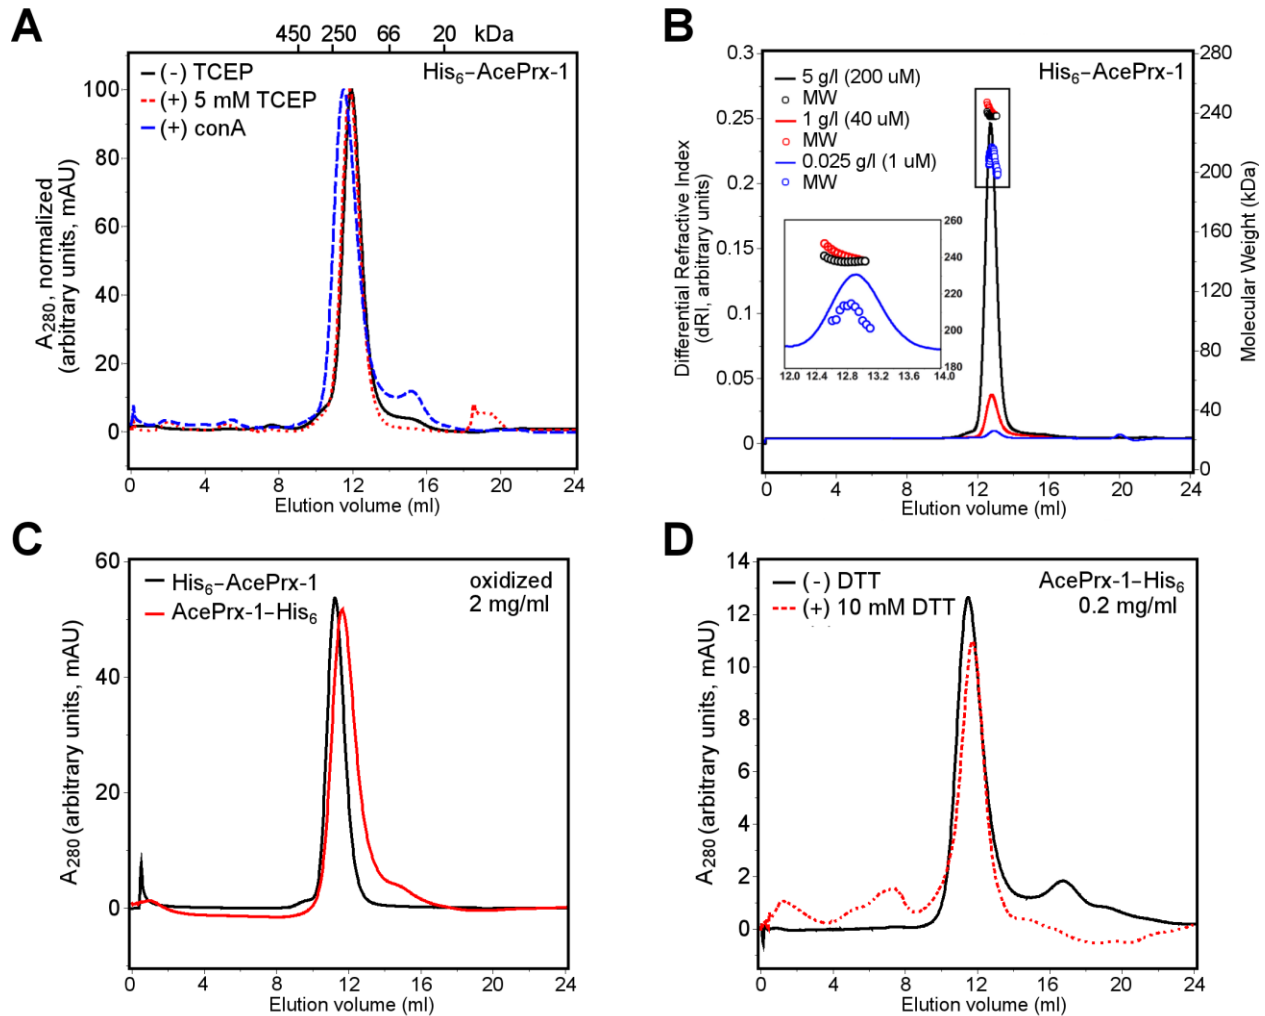

**Figure S2, related to Figure 5.** AcePrx-1 forms a stable decamer.

A. Size-exclusion chromatography in the presence and absence of conoidin A and reducing agent indicates that AcePrx-1 forms a large oligomer, which remains stable upon oxidation or crosslinking with conoidin A. The buffer was 10 mM HEPES 7.5, 100 mM NaCl.

B. Multi-angle light scattering (MALS) traces for AcePrx-1 under non-reducing conditions (10 mM HEPES 7.5, 100 mM NaCl) superimposed on the corresponding size-exclusion chromatography trace at different AcePrx-1 concentrations: 200 μM (black), 40 μM (red), and 1 μM (blue). AcePrx-1 is a stable decamer even in its oxidized form. The N-terminal 6xHis tag was not removed during purification.

C and D. Size-exclusion chromatographs of a C-terminal 6xHis tag construct (2 g/l or 0.2 g/l) suggest that it is a stable decamer in 10 mM HEPES 7.5, 100 mM NaCl, 5 mM EDTA, +/- 10 mM DTT as indicated.

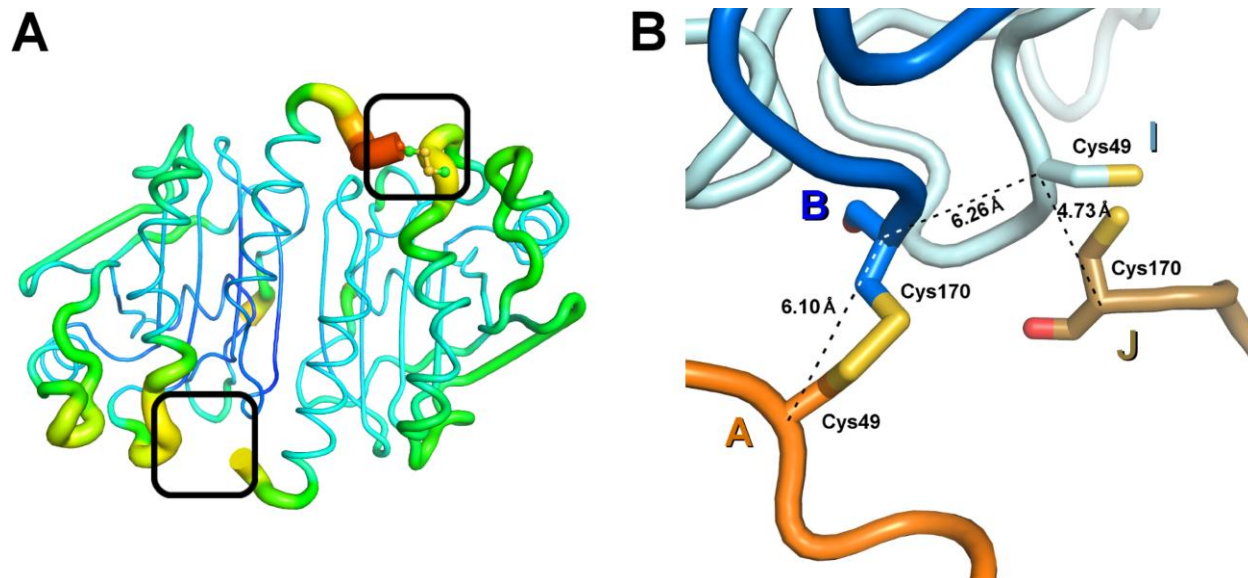

**Figure S3, related to Figure 6.** Disorder in the region of the catalytic cysteine residues. B-factor "putty" diagram showing increased conformational flexibility in the regions containing the active site cysteines in the structure of unliganded AcePrx-1.

Thin blue lines signify regions with low temperature factors (B-factors), which are indicative of low conformational flexibility and small thermal motions; thick red lines signify high B-factors, which are indicative of high conformational flexibility and large thermal motions.

**Table S1, related to Figures 3 and 4.** Detailed results from electrospray ionization mass spectrometry on WT and mutant AcePrx-1 in the presence and absence of conoidin A or conoidin B. Masses are listed in order of abundance.

| Protein         | Inhibitor | 1mer mass   | Mass diff | Modifications                  | 2mer mass    | Mass diff | Modifications |
|-----------------|-----------|-------------|-----------|--------------------------------|--------------|-----------|---------------|
| WT              | --        | 22960.0     |           |                                | 45920.0      |           |               |
|                 | conB      | 23004.5(*)  |           |                                | 46009.0(*)   |           |               |
|                 |           | 23049.0(**) |           |                                | 46279.0(***) |           |               |
|                 |           | 23337.5     | 377.5     | 2*QDO                          | 46279.0      | 359.0     | QDO + QMO     |
|                 |           | 23181.0     | 221.0     | 2*-SOH, QDO                    |              |           |               |
|                 |           | 23149.0     | 189.0     | QDO                            |              |           |               |
|                 | conA      | 23488.0     | 528.0     | QDO + 2*QMO<br>(or 2*QDO + Qx) |              |           |               |
|                 |           | 23147.0     | 187.0     | QDO                            | 46294.5      | 374.0     | 2*QDO         |
|                 |           | 23192.0(*)  | 187.5     | QDO                            | 46384.0(*)   | 375.0     | 2*QDO         |
|                 |           | 23237.0(**) | 188.0     | QDO                            | 46473.0(**)  | 375.0     | 2*QDO         |
|                 |           |             |           | 46553.5(***)                   | 374.5        | 2*QDO     |               |
| C73A/C170A      | --        | 22897.0     |           |                                | 45794.0      |           |               |
|                 | conB      | 22897.0     | 0.0       | --                             | 45794.5      | 0.5       | --            |
|                 |           | 23085.0     | 188.0     | QDO                            | 46170.5      | 376.5     | 2*QDO         |
|                 |           | 23067.0     | 170.0     | QMO                            |              |           |               |
|                 |           | 23275.0     | 378.5     | 2*QDO                          |              |           |               |
|                 | conA      | 23120.0     | 223.0     | 2*-SOH, QDO                    | 46239.0      | 445.0     | 2*SOH, QDO    |
|                 |           | 22898.5     | 1.5       | --                             | 45793.5      | -0.5      | --            |
|                 |           | 23100.0     | 203.0     | -SOH, QDO                      |              |           |               |
|                 |           |             |           |                                |              |           |               |
| C49A/C73A       | --        | 22897.5     |           |                                |              |           |               |
|                 | conB      | 23085.5     | 188.0     | QDO                            |              |           |               |
|                 |           | 23067.5     | 170.0     | QMO                            |              |           |               |
|                 |           | 23105.0     | 207.5     | -SOH, QDO                      |              |           |               |
|                 | conA      | 23083.5     | 186.0     | QDO                            |              |           |               |
|                 |           | 23121.0     | 223.5     | -2*-SOH, QDO                   |              |           |               |
| 23103.0         |           | 205.5       | -SOH, QDO |                                |              |           |               |
| C49A/C170A      | --        | 22897.5     |           |                                |              |           |               |
|                 | conB      | 22898.0     | 0.5       | --                             |              |           |               |
|                 | conA      | 22898.0     | 0.0       | --                             |              |           |               |
| C49A/C73A/C170A | --        | 22865.5     |           |                                |              |           |               |

|                | conB      | 22865.5                         | 0.0                        | --                                       |                      |                    |                                          |
|----------------|-----------|---------------------------------|----------------------------|------------------------------------------|----------------------|--------------------|------------------------------------------|
|                | conA      | 22865.0<br>23087.0 <sup>§</sup> | -0.5<br>221.5 <sup>§</sup> | --<br>2*-SOH, QDO <sup>§</sup>           |                      |                    |                                          |
| Protein        | Inhibitor | 1mer mass                       | Mass diff                  | Modifications                            | 2mer mass            | Mass diff          | Modifications                            |
| WTΔ171         | --        | 20270.5                         |                            |                                          | 40540.0              |                    |                                          |
|                | conB      | 20647.0                         | 376.5                      | 2*QDO                                    | 40537.5              | -2.5               | --                                       |
|                |           | 20629.0                         | 360.0                      | QMO+QDO                                  | 41294.5              | 754.5              | 4*QDO                                    |
|                |           | 20665.5                         | 395.0                      | 2*-SOH, QDO                              | 41259.0              | 719.0              | Qx+3*QDO                                 |
|                |           | 20473.5                         | 203.0                      | -SOH, QDO                                | 40913.0              | 373.0              | 2*QDO                                    |
|                |           | 20456.5                         | 186.0                      | QDO                                      | 41330.0              | 790.0              | 2*-SOH, 4*QDO                            |
|                | conA      | 20456.5                         | 186.0                      | QDO                                      | 40727.5              | 187.5              | QDO                                      |
|                |           |                                 |                            | 40725.0                                  | 185.5                | QDO                |                                          |
|                |           |                                 |                            | 40913.0                                  | 373.0                | 2*QDO              |                                          |
| C49A           | --        | 22929.5<br>23187.0(*)           |                            |                                          | 45858.5              |                    |                                          |
|                | conB      | 23117.5                         | 188.0                      | QDO                                      | 46234.0              | 375.5              | 2*QDO                                    |
|                |           | 23100.0                         | 170.5                      | QMO                                      | 46199.0              | 340.5              | 2*QMO                                    |
|                |           | 23135.5                         | 206.0                      | -SOH, QDO                                |                      |                    |                                          |
|                |           | 23205.5(*)                      | 18.5                       | -SOH                                     |                      |                    |                                          |
|                | conA      | 23376.5(*)                      | 190.0                      | QDO                                      |                      |                    |                                          |
|                |           | ND                              | ND                         | ND                                       | ND                   | ND                 | ND                                       |
| C170A          | --        | 22929.5                         |                            |                                          | 45858.5              |                    |                                          |
|                | conB      | 23117.5                         | 187.0                      | QDO                                      | 46235.5              | 376.5              | 2*QDO                                    |
|                |           | 23135.5                         | 206.0                      | -SOH, QDO                                |                      |                    |                                          |
|                |           | 23152.0                         | 223.0                      | 2*-SOH, QDO                              |                      |                    |                                          |
|                | conA      | 23374.5 <sup>§</sup>            | 445.0 <sup>§</sup>         | 2*-SO <sub>2</sub> H, 2*QDO <sup>§</sup> | 46303.0              | 444.5              | 4*-SOH, 2*QDO                            |
|                |           | 23194.5                         | 265.0                      | conB                                     |                      |                    |                                          |
| C73A           | --        | 22928.5                         |                            |                                          | 45856.0              |                    |                                          |
|                | conB      | 23287.5                         | 359.0                      | QDO+QMO                                  | 45855.5              | -0.5               | --                                       |
|                |           | 23305.0                         | 376.5                      | 2*QDO                                    |                      |                    |                                          |
|                | conA      | 23115.5                         | 187.0                      | QDO                                      | 46230.5              | 374.5              | 2*QDO                                    |
|                |           | 23132.5                         | 204.0                      | -SOH, QDO                                | 46043.0              | 187.0              | QDO                                      |
|                |           |                                 |                            |                                          | 46488.0              | 632.0              | 4*-SOH, 3*QDO                            |
| C49A/C73A/Δ171 | --        | 20206.5<br>20464.5(*)           |                            |                                          | 40413.5              |                    |                                          |
|                | conB      | 20394.5                         | 188.0                      | QDO                                      | 40789.0              | 375.5              | 2*QDO                                    |
|                |           | 20652.5(*)                      | 188.0                      | QDO                                      | 41305.0 <sup>§</sup> | 891.5 <sup>§</sup> | 4*-SO <sub>2</sub> H, 4*QDO <sup>§</sup> |

|  |      |            |       |                         |         |       |               |
|--|------|------------|-------|-------------------------|---------|-------|---------------|
|  |      | 20414.0    | 207.5 | -SOH, QDO               |         |       |               |
|  | conA | 20392.5    | 186.0 | QDO                     | 40785.0 | 371.5 | 2*QDO         |
|  |      | 20411.0    | 204.5 | -SOH, QDO               | 40820.5 | 407.0 | 2*-SOH, 2*QDO |
|  |      | 20429.5    | 223.0 | -SO <sub>2</sub> H, QDO | 40860.0 | 446.5 | 4*-SOH, 2*QDO |
|  |      | 20650.5(*) | 186.0 | QDO                     | 40742.0 | 328.5 | Qx+QMO        |
|  |      | 20669.0(*) | 206.0 | -SOH, QDO               |         |       |               |
|  |      | 20687.0(*) | 223.0 | 2*-SOH, QDO             |         |       |               |

QDO, quinoxaline 1,4-dioxide form of conoidin A

QMO, quinoxaline mono-oxide form of conoidin A

Qx, quinoxaline form of conoidin A

-SOH, oxidation to sulfenic acid

-SO<sub>2</sub>H, oxidation to sulfinic acid

§ suggests modification on a residue other than cysteine
